# Supplementary material for: Flexible electrochromic devices prepared on ultra-thin ITO glass
Source: Royal Society of Chemistry journal article supplement (doi:10.1039/d1ma00376c), 2021-01-01
Supplement: d1ma00376c1.pdf [file d1ma00376c1.pdf]

## Supporting Information

### Flexible electrochromic devices prepared on ultra-thin ITO glass

Marco Schott,\* Lukas Niklaus, Christine Müller, Begüm Bozkaya, and Guinevere A. Giffin

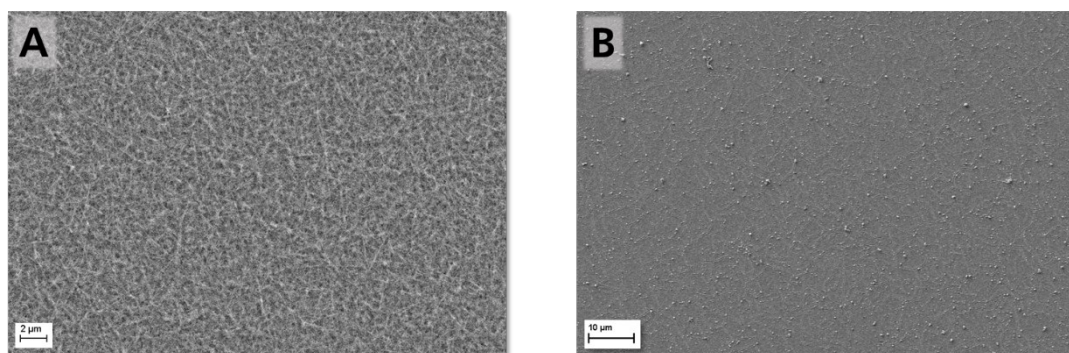

Fig. S1: SEM top-view images depicting the surface morphology of the (A) Fe-MEPE and (B) PB layer on ultra-thin ITO glass.

Tab. S1: Color ( $L^*a^*b^*$ ) coordinates, transmittance at  $\lambda_{\text{max}}$ , visible light transmittance ( $\tau_v$ ) of the EC electrodes (Fe-MEPE and PB on ultra-thin glass).

| EC electrodes | $L^*$ | $a^*$ | $b^*$ | $\lambda_{\text{max}}$<br>/ nm | Transmittance at<br>$\lambda_{\text{max}}$ / % | $\tau_v$<br>/ % |
|---------------|-------|-------|-------|--------------------------------|------------------------------------------------|-----------------|
| Fe-MEPE       | 45.5  | -1.1  | -32.6 | 593                            | 0.6                                            | 13              |
| PB            | 82.5  | -11.6 | -10.7 | 701                            | 37                                             | 60              |

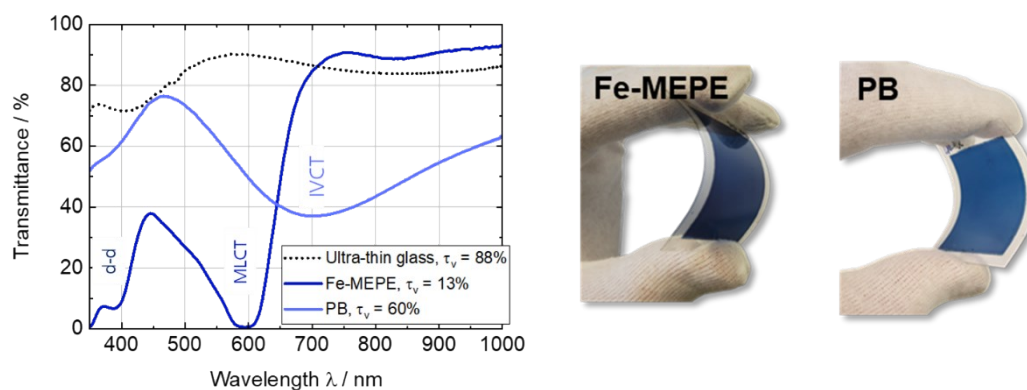

Fig. S2: Transmittance spectra and photographic images of Fe-MEPE and PB thin films on ultra-thin ITO glass (100 μm).

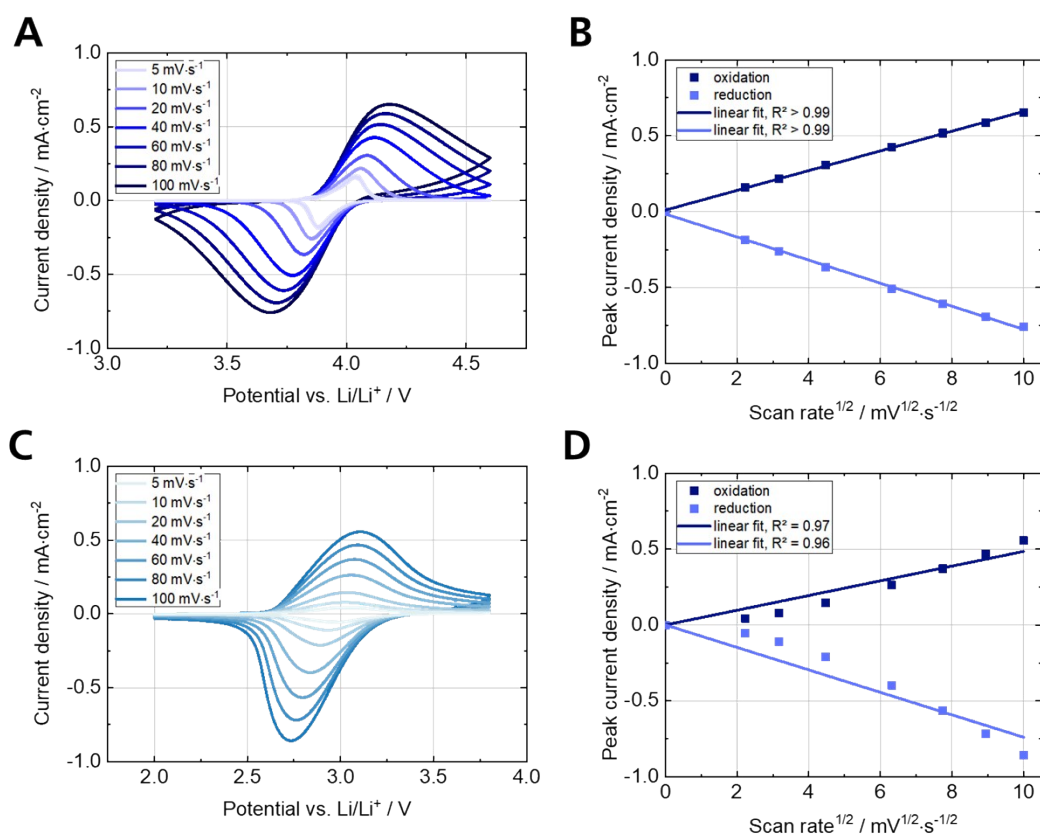

Fig. S3 Cyclic voltammograms and the corresponding current density vs. square root of the scan rate plots of (A,B) Fe-MEPE and (C,D) PB on ultra-thin glass.

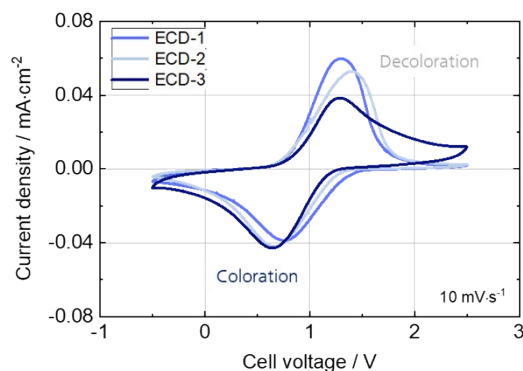

Fig. S4 Cyclic voltammograms (at  $10 \text{ mV s}^{-1}$ ) of the Fe-MEPE/PB ECDs (active area:  $3.5 \times 3.5 \text{ cm}^2$ ).

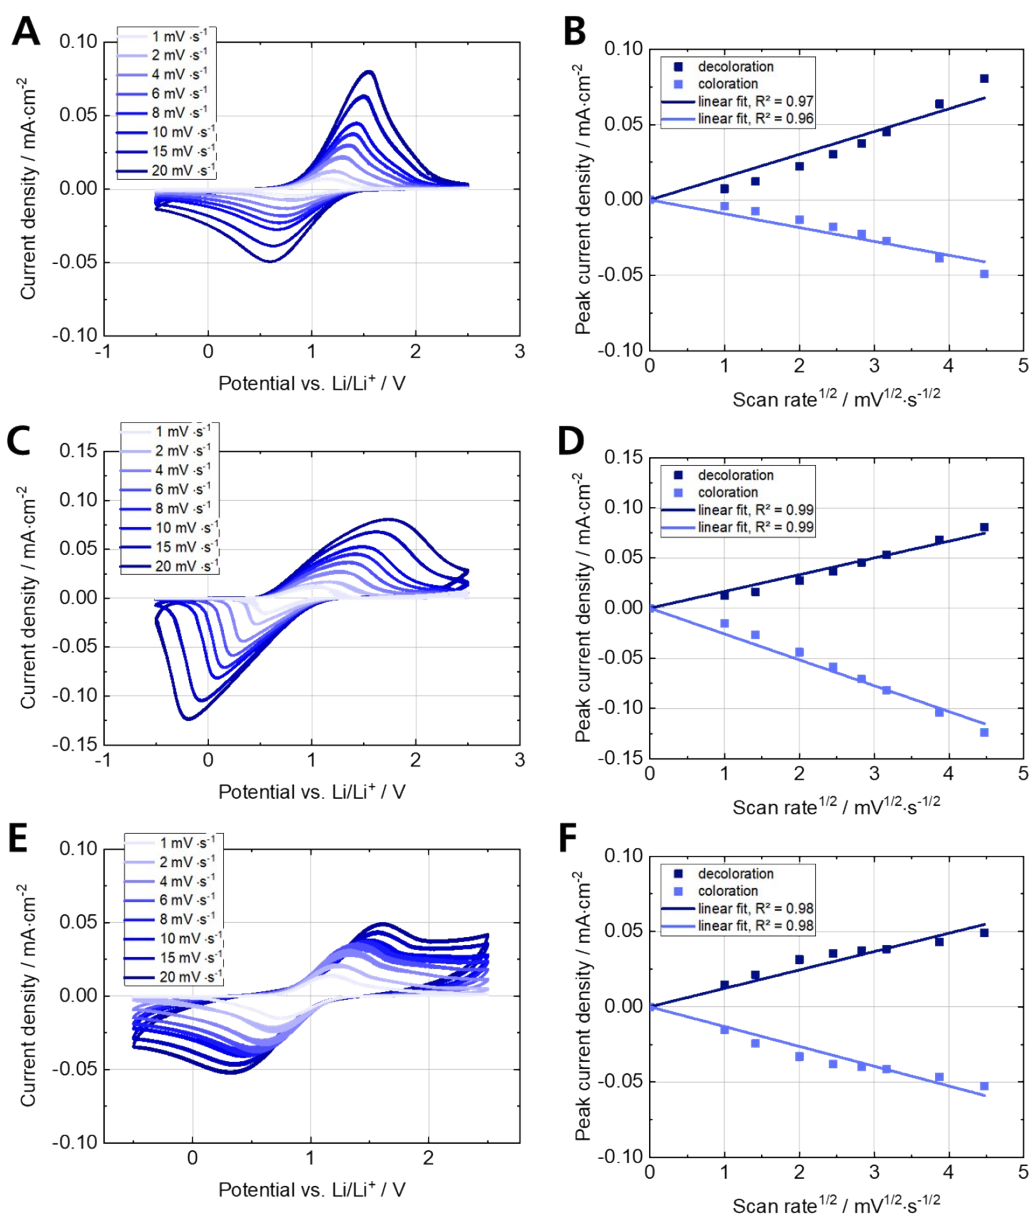

Fig. S5 Cyclic voltammograms and the corresponding peak current density vs. square root of the scan rate plots of (A,B) ECD-1, (C,D) ECD-2, and (E,F) ECD-3 (active area:  $3.5 \times 3.5 \text{ cm}^2$ ).

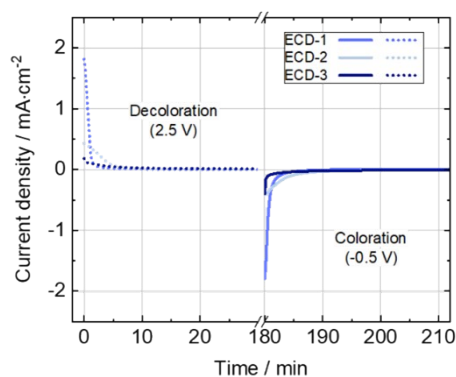

Fig. S6: Current density-time profile of the Fe-MEPE/PB ECDs (active area:  $3.5 \times 3.5 \text{ cm}^2$ ).

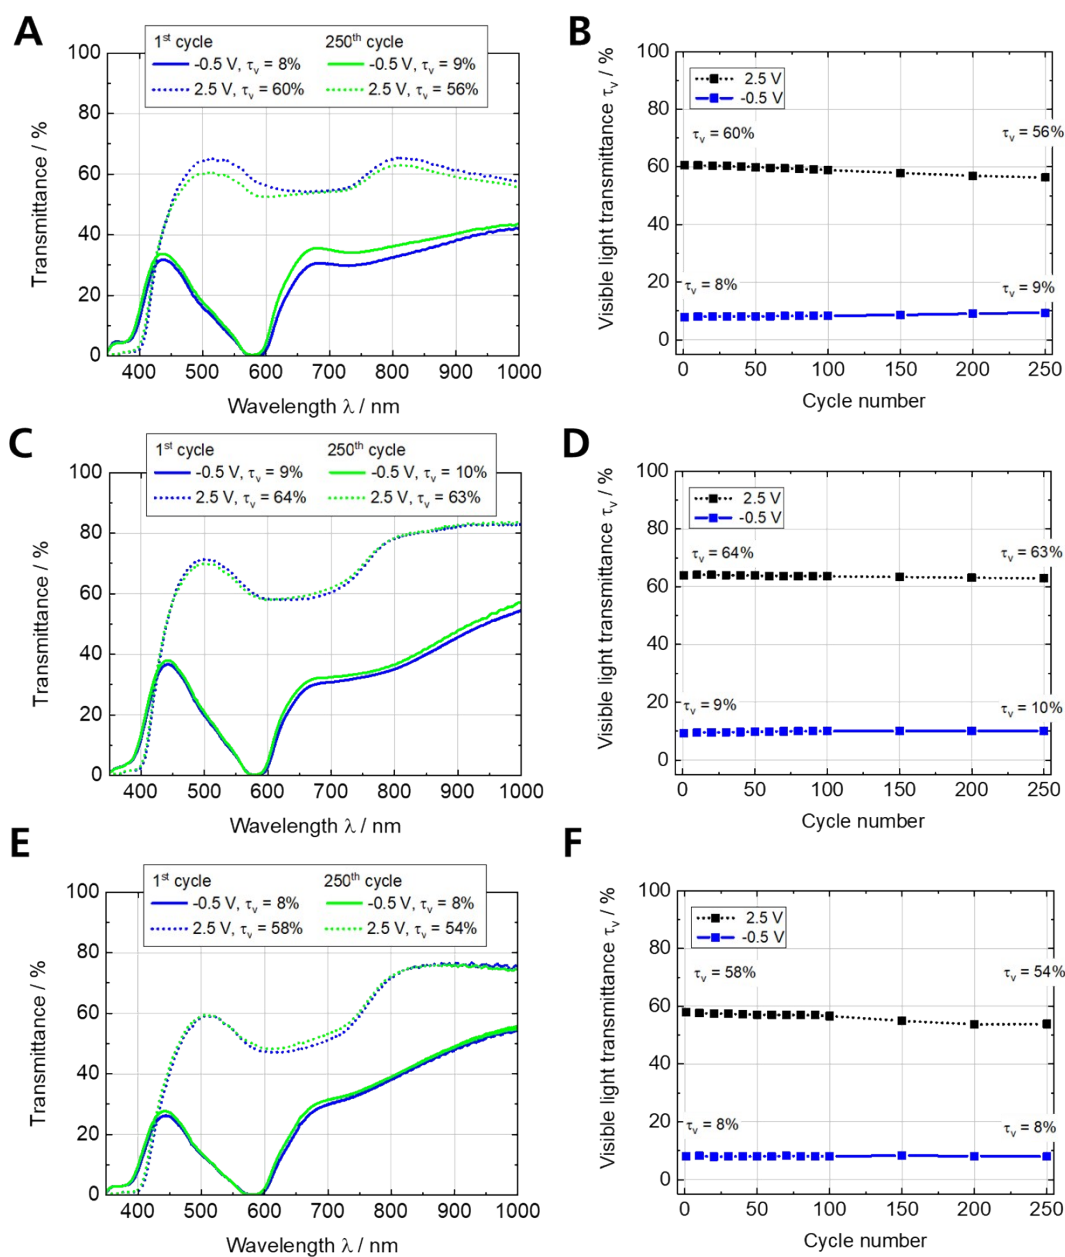

Fig. S7: Spectroelectrochemical characterization and change in visible light transmittance ( $\tau_v$ ) over 250 potentiostatic cycles of the Fe-MEPE/PB ECDs (active area:  $3.5 \times 3.5 \text{ cm}^2$ ) on (A,B) FTO glass, (C,D) PET-ITO, and (E,F) ultra-thin ITO glass.
